# Supplementary material for: Constructing ultra-stable and high-performance zinc-ion batteries through Mn doped vanadium oxide nanobelt cathode
Source: Royal Society of Chemistry journal article supplement (doi:10.1039/d3ce01271a), 2024-01-01
Supplement: d3ce01271a1.pdf [file d3ce01271a1.pdf]

**Support information for: Constructing ultra-stable and  
high-performance zinc-ion batteries through Mn doped  
vanadium oxide nanobelt cathode**

Tiantian Wang<sup>a</sup>, Yapeng Yuan<sup>a</sup>, Mengwei Chang<sup>a</sup>, Yue Zhang<sup>a</sup>,

Junhua You<sup>a</sup>, Fang Hu,<sup>\*a</sup>

<sup>a</sup>School of Materials Science and Engineering, Shenyang University  
of Technology, Shenyang 110870, Liaoning, China

E-mail: hufang25@126.com

## Experimental Section

Materials preparation: The  $\text{Mn}_x\text{VO}_2 \cdot 0.2\text{H}_2\text{O}$  was prepared with a simple solvothermal method. The Solvothermal solution was prepared by dissolving 0.6g  $\text{V}_2\text{O}_5$  powder and 1.2g  $\text{H}_2\text{C}_2\text{O}_4$  powder into 20 mL of distilled water at 85 °C for vigorous stirring about 3 h until  $\text{VO}_2\text{C}_2\text{O}_4$  (dark blue solution) was formed. Then 4.67 mL 30 %  $\text{H}_2\text{O}_2$  was slowly added (this step reacts violently) and kept continuously stirring about 30 min to obtain a brown solution, then 16 mg  $\text{Mn}(\text{CH}_3\text{COO})_2 \cdot 4\text{H}_2\text{O}$  was finally added into above-mentioned solution to obtain the Mn-doped vanadium oxide solution and stirred for 10 min until it was totally dissolved. The mixture was then given a 60 mL ethanol addition, and stirring continued for 60 min. The created dark-green slurry was then put into a 100 mL Teflon-lined autoclave and heated to 170°C for 12 hours. The precipitate was then collected, carefully cleaned with ethanol and deionized water, and dried for 12 hours at 60°C.

We analyzed the samples with an X-ray diffractometer using Cu  $K\alpha$  radiation ( $\lambda = 0.1542$  nm). In order to determine the morphology and microstructure of the samples, scanning electron microscopy (SEM, Hitachi-4800) and transmission electron microscopy (TEM, JEM-2100 PLUS) were carried out. Chemical bond valences and elemental compositions of the cathode material surface were measured using X-ray photoelectron spectroscopy (XPS). A Bruker D8 Advance diffractometer was used to measure ex-situ XRD patterns of the samples.

The calculations are implemented in Vienna Ab-initio Simulation Package

of density functional theory, which use projector augmented wave method<sup>1</sup>. The following valence electron configurations are used: O( $1S^22S^22P^4$ ), V( $(1S^22S^22P^63S^23P^64S^23d^3)$ ), Mn( $1S^22S^22P^63S^23P^64S^23d^5$ ) and Zn( $1S^22S^22P^63S^23P^64S^23d^{10}$ ). We select generalized gradient approximation (PBE flavor) as exchange-correlation potential<sup>2</sup>. Brillouin zone integrations are used for geometry optimization and electronic structure calculations, performing on  $2 \times 2 \times 3$  k-meshes. The energy criterion, iterative solution of the kohn-sham equations is set to  $10^{-5}$  eV. A cut-off energy of plane wave basis is performed 450 eV, which is decided to yield converged results. On the atoms, the residual force is set to 0.03 eV/Å. When it less than 0.03 eV/Å, the structures will be relaxed.

An active electrode was prepared by mixing acetylene black, polytetrafluoroethylene emulsion, and active materials in a weight ratio of 2:1:7. Then upon rolling the mixture into a uniform thickness, which was pressed onto conductive carbon paper with a diameter of 1 cm. The active materials were loaded at an average mass of 1.3 mg/cm<sup>2</sup>. A solution of Zn(CF<sub>3</sub>SO<sub>3</sub>)<sub>2</sub> was used as the electrolyte. The electrochemical characteristics and electrochemical reaction kinetics analysis of the coin cells were tested using an electrochemical workstation (Bio-Logic VSP-300). Galvanostatic charge-discharge cycling was carried out using multichannel galvanostatic testers (Neware CT-4000).

**TableS1.** ICP test results

| Sample label | Element label | Weight /g | volume ml | Dilution coefficient | Instrument reading mg/L | Sample concentration | Unit  |
|--------------|---------------|-----------|-----------|----------------------|-------------------------|----------------------|-------|
| Yan Chen     | Mn            | 0.0546    | 50        | 50                   | 0.448                   | 20512.7365           | mg/kg |
| Yan Chen     | V             | 0.0546    | 50        | 50                   | 11.4468                 | 524120.7064          | mg/kg |

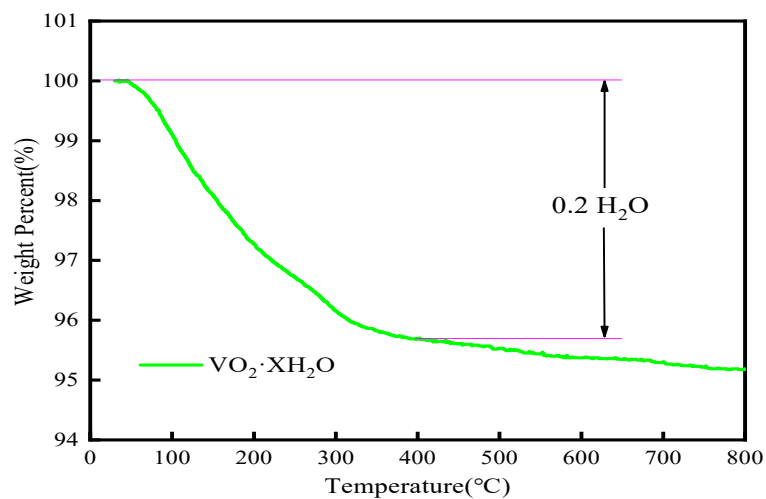

**Figure S1.** Thermogravimetric Curve of  $\text{VO}_2 \cdot 0.2\text{H}_2\text{O}$

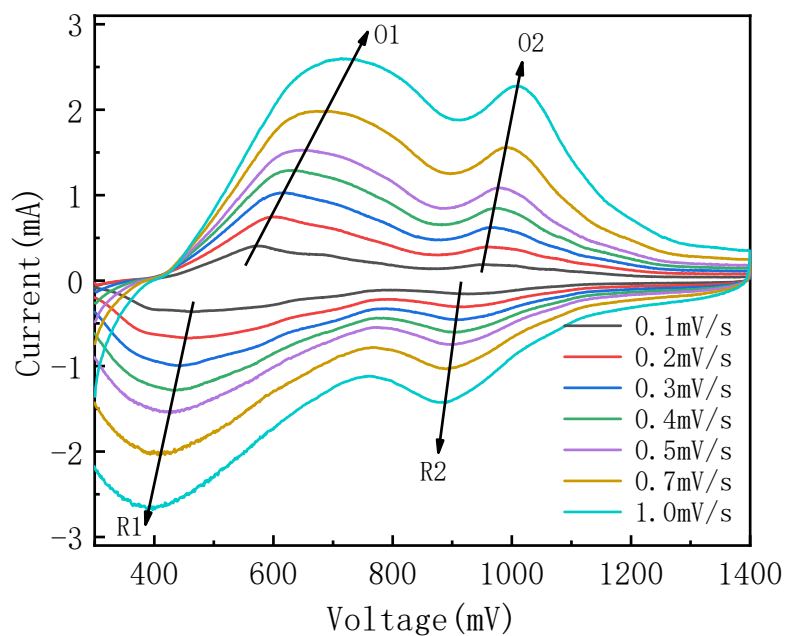

**Figure S2.** CV curves of  $\text{VO}_2 \cdot 0.2\text{H}_2\text{O}$  at different scan rates

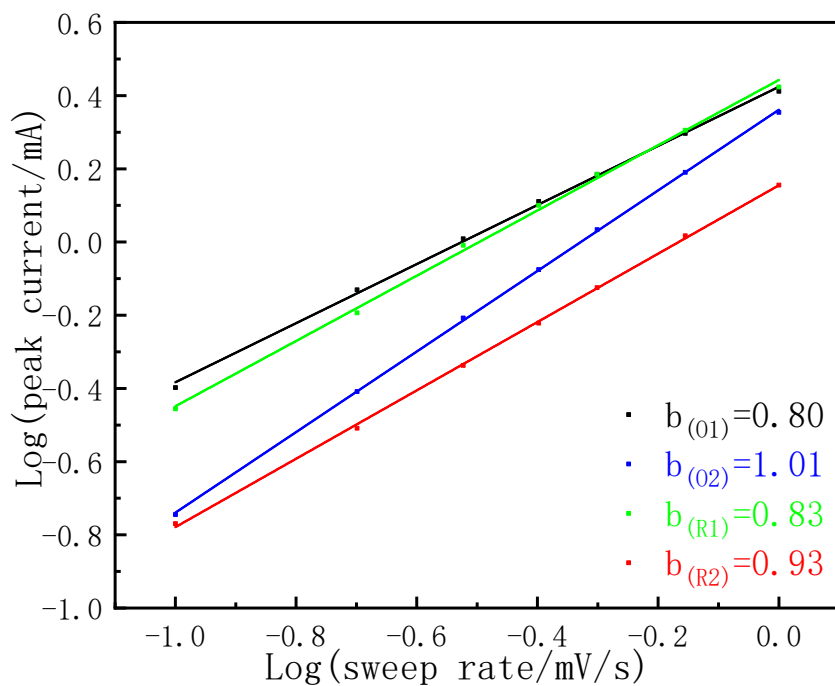

**Figure S3.** Log (i, current) versus log (mV, scan rate) plots of  $\text{VO}_2 \cdot 0.2\text{H}_2\text{O}$  at specific current.

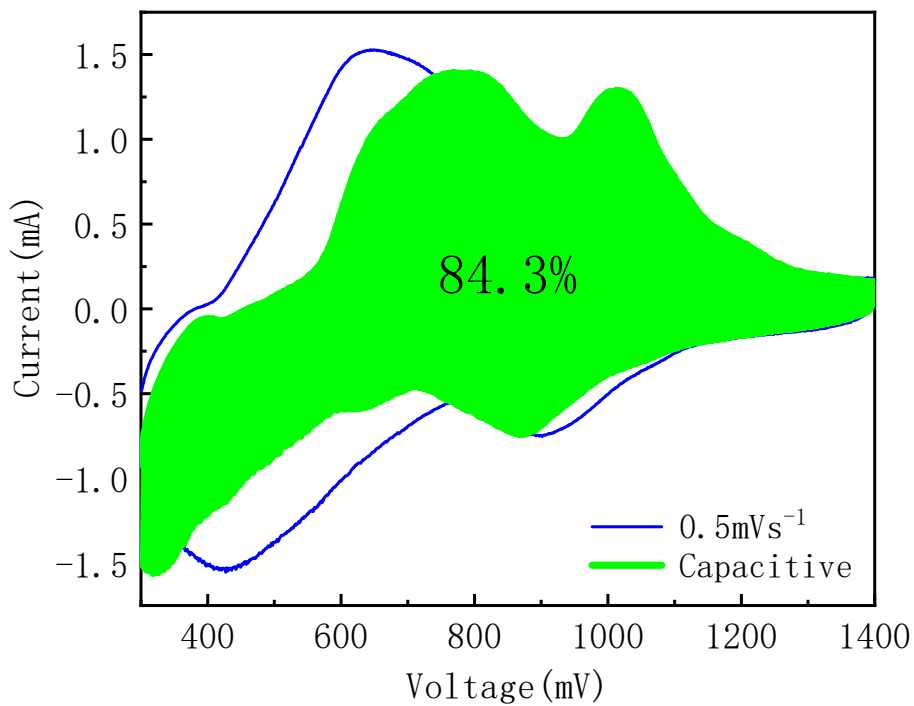

**Figure S4.** The capacitive contribution ratio of  $\text{VO}_2 \cdot 0.2\text{H}_2\text{O}$  at  $0.5 \text{ mVs}^{-1}$  scan rates

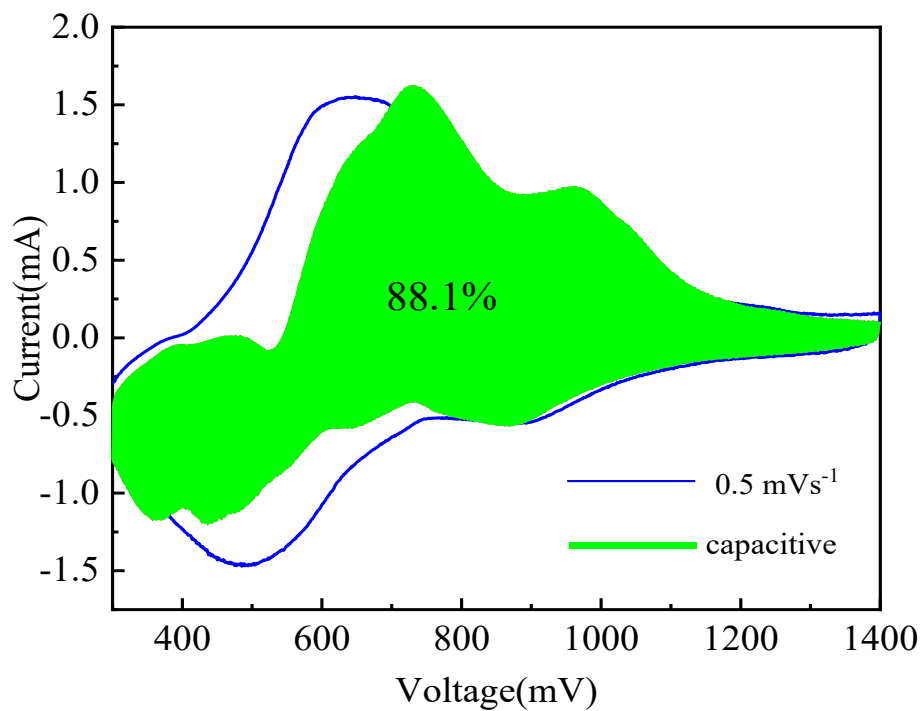

**Figure S5.** The capacitive contribution ratio of  $\text{Mn}_x\text{VO}_2 \cdot 0.2\text{H}_2\text{O}$  at  $0.5 \text{ mVs}^{-1}$  scan rates

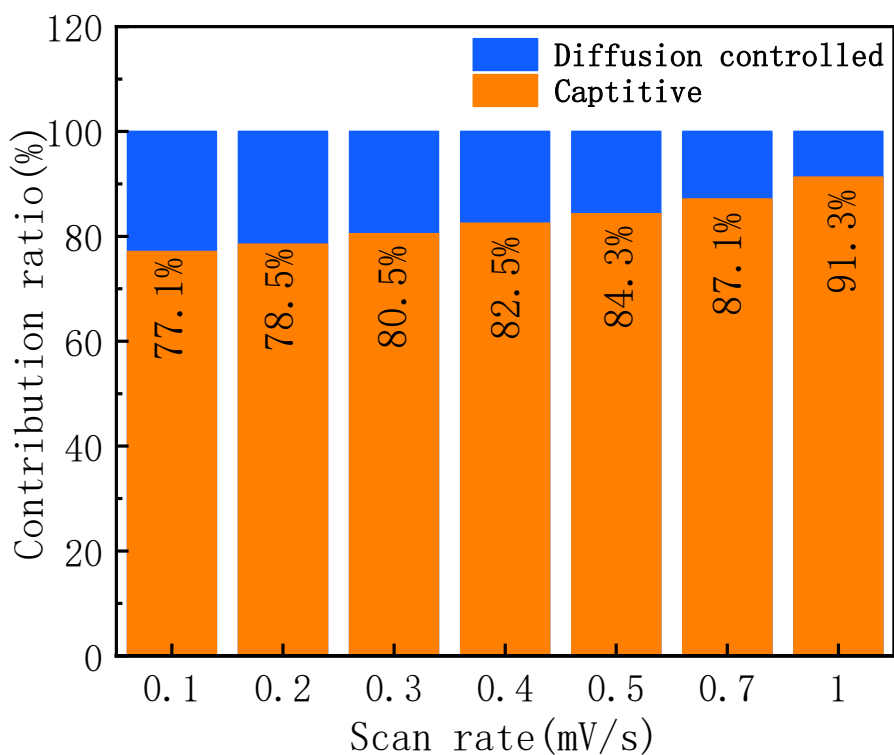

**Figure S6.** The capacitive contribution ratio of  $\text{VO}_2 \cdot 0.2\text{H}_2\text{O}$  at various scan rate

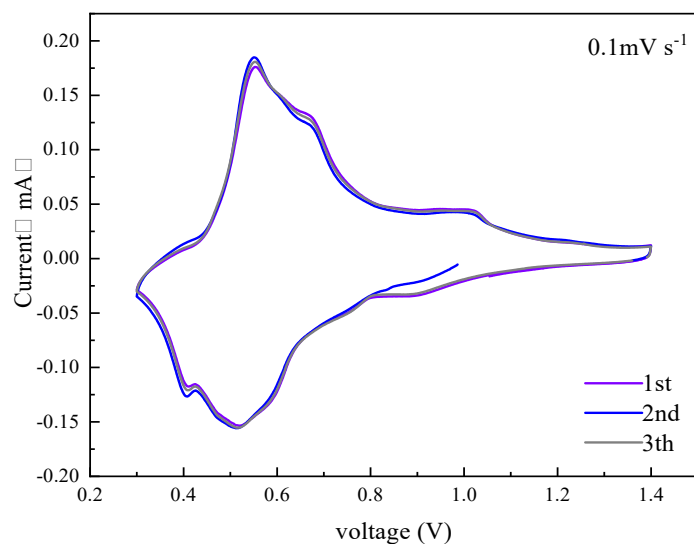

**Figure S7.** CV curves of  $\text{VO}_2 \cdot 0.2\text{H}_2\text{O}$  collected at a scan rate of  $0.1 \text{ mV s}^{-1}$ .

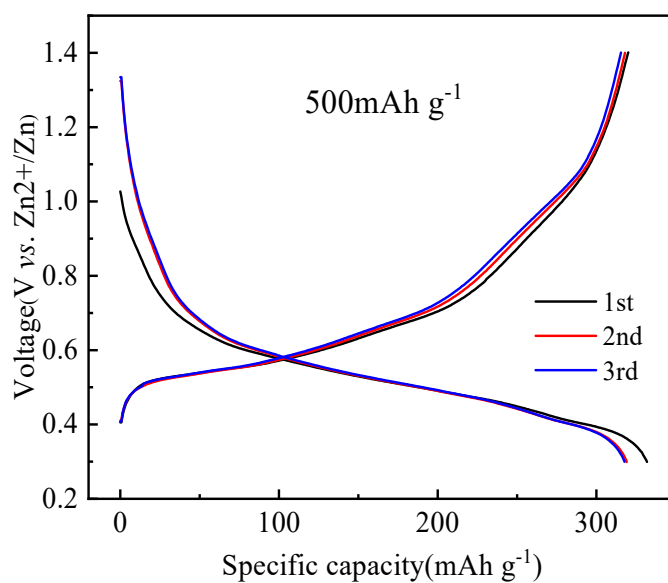

**Figure S8.** The first three discharge-charge profiles of  $\text{VO}_2 \cdot 0.2\text{H}_2\text{O}$  at a current density of  $500 \text{ mAh g}^{-1}$ .

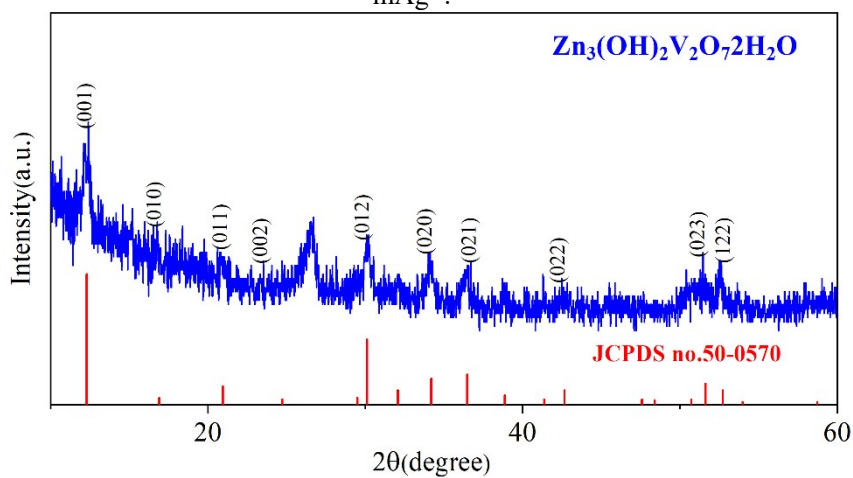

**Figure S9.** XRD patterns of  $\text{Mn}_x\text{VO}_2 \cdot 0.2\text{H}_2\text{O}$  electrode sheet after 500 cycles

**Table S2.** Electrochemical impedance spectra of  $\text{Mn}_x\text{VO}_2 \cdot 0.2\text{H}_2\text{O}$  and  $\text{VO}_2 \cdot 0.2\text{H}_2\text{O}$

|                            | $\text{Mn}_x\text{VO}_2 \cdot 0.2\text{H}_2\text{O}$<br>Pristine electrode | $\text{VO}_2 \cdot 0.2\text{H}_2\text{O}$<br>Pristine<br>electrode | $\text{Mn}_x\text{VO}_2 \cdot 0.2\text{H}_2\text{O}$<br>10 cycles | $\text{VO}_2 \cdot 0.2\text{H}_2\text{O}$<br>10 cycles |
|----------------------------|----------------------------------------------------------------------------|--------------------------------------------------------------------|-------------------------------------------------------------------|--------------------------------------------------------|
| Equivalent circuit diagram |                                                                            |                                                                    |                                                                   |                                                        |
| R2( $\Omega$ )             | 9.68                                                                       | 18.96                                                              | 36.52                                                             | 67.14                                                  |
| R1( $\Omega$ )             | 2.23                                                                       | 2.76                                                               | 2.14                                                              | 2.21                                                   |

**Table S3.** The integral of the ICOHP

| COHP# Zn- $\text{Mn}_{0.04}\text{VO}_2$ | atom | atom | distance | ICOHP    |
|-----------------------------------------|------|------|----------|----------|
| Spin up                                 | V17  | O89  | 2.20497  | -1.96883 |
| Spin down                               | V17  | O89  | 2.20497  | -2.02170 |

| COHP# Zn- $\text{VO}_2$ | atom | atom | distance | ICOHP    |
|-------------------------|------|------|----------|----------|
| Spin up                 | V15  | O87  | 2.08418  | -1.77492 |
| Spin down               | O15  | V87  | 2.08418  | -1.83334 |



## Reference

- (1) Enkovaara, J.; Rostgaard, C.; Mortensen, J. J.; Chen, J.; Dułak, M.; Ferrighi, L.; Gavnholt, J.; Glinsvad, C.; Haikola, V.; Hansen, H., Electronic structure calculations with GPAW: a real-space implementation of the projector augmented-wave method. *Journal of physics: Condensed matter* **2010**, *22* (25), 253202.
- (2) Perdew, J. P.; Burke, K.; Ernzerhof, M., Generalized gradient approximation made simple. *Physical review letters* **1996**, *77* (18), 3865.
